# Supplementary material for: Ventilator-induced lung injury results in oxidative stress response and mitochondrial swelling in a mouse model
Source: PubMed Central journal article supplement (PMC9308307; doi:10.1186/s42826-022-00133-4), 2022-07-22

A

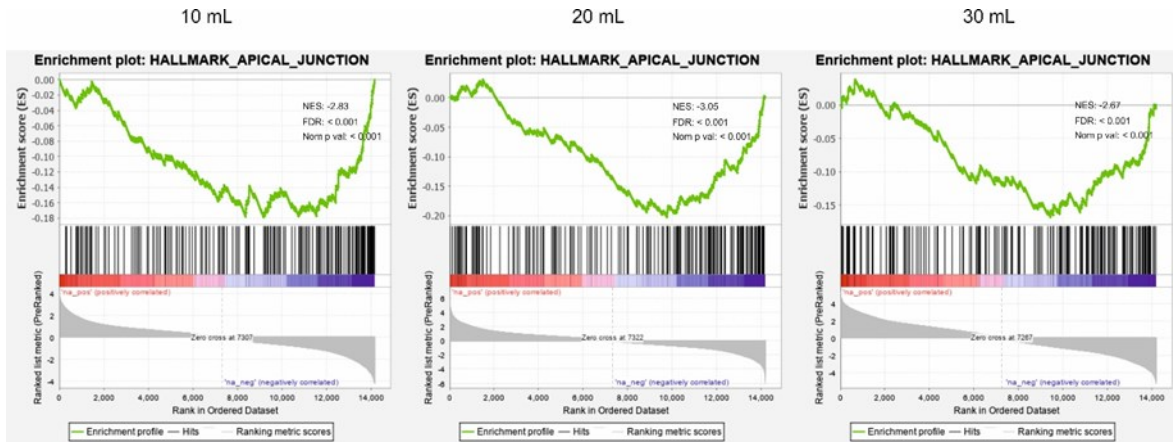

B

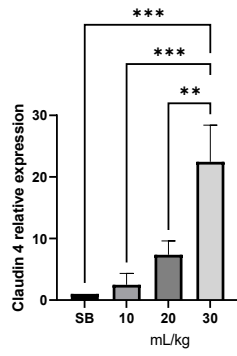

Supplement: 42826_2022_133_MOESM2_ESM.pdf [file 42826_2022_133_MOESM2_ESM.pdf]
